# Supplementary material for: An Integrated Approach for the Recovery of Sn from Used Water Adsorbents
Source: MDPI journal article supplement (doi:10.3390/w15010097), 2022-12-28
Supplement: s1 [file s1]

# Supplementary Materials

## An integrated approach for the recovery of used tin as water adsorbent

Efthimia Kaprara, Evangelia Daskalopoulou, Konstantinos Simeonidis, Manassis Mitrakas

Department of Chemical Engineering, Aristotle University of Thessaloniki, 54124 Greece

**Table S1.** Sn and Cr concentration in solids produced at reconstruction process in relation to 1<sup>st</sup> precipitation step pH (reductant: N<sub>2</sub>H<sub>4</sub>·2HCl, pH<sub>2</sub>: 7)

| 1 <sup>st</sup> precipitation step |        |           |        | 2 <sup>nd</sup> precipitation step |           |        |
|------------------------------------|--------|-----------|--------|------------------------------------|-----------|--------|
| pH                                 | Sn (%) | Cr (mg/g) | m (mg) | Sn (%)                             | Cr (mg/g) | m (mg) |
| 2.5                                | 65.6%  | 19.2      | 121    | 73.1%                              | 12.5      | 42     |
| 3                                  | 67.1%  | 20.2      | 138    | 70.4%                              | 3         | 26     |
| 3.5                                | 67.4%  | 19.2      | 148    | 68.7%                              | 2.2       | 17     |
| 4                                  | 67.5%  | 17.9      | 161    | 68.0%                              | 1.2       | 3      |

**Table S2.** Parameters of Freundlich fitting on Cr(VI) adsorption isotherms in distilled and natural-like water at 20° C and equilibrium pH 6–8 for the recovered adsorbent.

| Water                 | pH | $K_F$<br>( $\mu\text{g}_{\text{Cr(VI)}}/\text{mg}_{\text{ads}})/(\mu\text{g/L})^{1/\eta}$ | 1/n   | R <sup>2</sup> | Q <sub>25</sub><br>mg/g |
|-----------------------|----|-------------------------------------------------------------------------------------------|-------|----------------|-------------------------|
| Distilled             | 6  | 34.0                                                                                      | 0.017 | 0.9646         | 35.4                    |
|                       | 7  | 28.6                                                                                      | 0.022 | 0.9944         | 30.7                    |
|                       | 8  | 27.7                                                                                      | 0.016 | 0.9358         | 29.2                    |
| Natural-like<br>(NSF) | 6  | 18.7                                                                                      | 0.020 | 0.9680         | 20.0                    |
|                       | 7  | 16.5                                                                                      | 0.012 | 0.9618         | 17.1                    |
|                       | 8  | 15.1                                                                                      | 0.018 | 0.9713         | 16.0                    |

**Table S3.** Parameters of Langmuir fitting on Cr(VI) adsorption isotherms in distilled and natural-like water at 20° C and equilibrium pH 6–8 for the recovered adsorbent.

| Water                 | pH | $K_L$<br>L/ $\mu\text{g}$ | $Q_{\text{max}}$<br>$\mu\text{g}_{\text{Cr(VI)}}/\text{mg}_{\text{ads}}$ | R <sup>2</sup> |
|-----------------------|----|---------------------------|--------------------------------------------------------------------------|----------------|
| Distilled             | 6  | 0.047                     | 39.7                                                                     | 0.9998         |
|                       | 7  | 0.067                     | 34.4                                                                     | 0.9999         |
|                       | 8  | 0.323                     | 31.3                                                                     | 0.9999         |
| Natural-like<br>(NSF) | 6  | 0.025                     | 22.4                                                                     | 0.9990         |
|                       | 7  | 0.033                     | 18.5                                                                     | 0.9995         |
|                       | 8  | 0.031                     | 17.7                                                                     | 0.9992         |
